# Supplementary material for: Socio-spatial equity analysis of relative wealth index and emergency obstetric care accessibility in urban Nigeria
Source: Springer Nature journal article supplement (doi:10.1038/s43856-024-00458-2), 2024-02-28
Supplement: 43856_2024_458_MOESM2_ESM.pdf [file 43856_2024_458_MOESM2_ESM.pdf]

## Supplementary Information

Wong et al. 2024. Relative wealth index and accessibility to emergency obstetric care in urban Nigeria: A socio-spatial equity analysis

### Table of Contents

|                                                                                           |    |
|-------------------------------------------------------------------------------------------|----|
| Supplementary Table 1. Summary characteristics of the included cities.....                | 2  |
| Supplementary Figure 1. S2 cells included in the current analysis for Aba.....            | 3  |
| Supplementary Figure 2. S2 cells included in the current analysis for Abuja.....          | 4  |
| Supplementary Figure 3. S2 cells included in the current analysis for Benin City.....     | 5  |
| Supplementary Figure 4. S2 cells included in the current analysis for Ibadan.....         | 6  |
| Supplementary Figure 5. S2 cells included in the current analysis for Ilorin.....         | 7  |
| Supplementary Figure 6. S2 cells included in the current analysis for Jos.....            | 8  |
| Supplementary Figure 7. S2 cells included in the current analysis for Kaduna.....         | 9  |
| Supplementary Figure 8. S2 cells included in the current analysis for Kano.....           | 10 |
| Supplementary Figure 9. S2 cells included in the current analysis for Lagos.....          | 11 |
| Supplementary Figure 10. S2 cells included in the current analysis for Maiduguri.....     | 12 |
| Supplementary Figure 11. S2 cells included in the current analysis for Onitsha.....       | 13 |
| Supplementary Figure 12. S2 cells included in the current analysis for Owerri.....        | 14 |
| Supplementary Figure 13. S2 cells included in the current analysis for Port Harcourt..... | 15 |
| Supplementary Figure 14. S2 cells included in the current analysis for Uyo.....           | 16 |
| Supplementary Figure 15. S2 cells included in the current analysis for Warri.....         | 17 |

**Supplementary Table 1.** Summary characteristics of the included cities

| City          | Number of S2 cells | Percentage of S2 cells with no population | Percentage of S2 cells with unavailable travel time <sup>^</sup> | Public hospitals | Private hospitals | All hospitals | Estimated population 2022 | Estimated population 2030 | Number of women of childbearing age, 2022 | Percentage of women of childbearing age, 2022 |
|---------------|--------------------|-------------------------------------------|------------------------------------------------------------------|------------------|-------------------|---------------|---------------------------|---------------------------|-------------------------------------------|-----------------------------------------------|
| Owerri        | 780                | 0.0                                       | 0.0                                                              | 2                | 74                | 76            | 945,046                   | 1,282,000                 | 230,314                                   | 24.4                                          |
| Onitsha       | 2,139              | 4.3                                       | 3.1                                                              | 1                | 116               | 117           | 1,552,630                 | 2,138,000                 | 397,541                                   | 25.6                                          |
| Aba           | 2,337              | 0.0                                       | 0.0                                                              | 2                | 106               | 108           | 1,150,116                 | 1,527,000                 | 377,554                                   | 32.8                                          |
| Abuja         | 18,989             | 1.3                                       | 0.6                                                              | 18               | 53                | 71            | 3,652,029                 | 5,119,000                 | 1,095,195                                 | 30                                            |
| Benin City    | 16,772             | 30.2                                      | 6.5                                                              | 4                | 70                | 74            | 1,841,084                 | 2,451,000                 | 482,055                                   | 26.2                                          |
| Ibadan        | 8,844              | 0.0                                       | 0.0                                                              | 11               | 152               | 163           | 3,756,445                 | 4,956,000                 | 955,580                                   | 25.4                                          |
| Ilorin        | 2,965              | 0.3                                       | 0.2                                                              | 7                | 68                | 75            | 1,000,477                 | 1,314,000                 | 283,066                                   | 28.3                                          |
| Jos           | 8,947              | 8.2                                       | 4.8                                                              | 6                | 70                | 76            | 942,167                   | 1,236,000                 | 344,494                                   | 36.6                                          |
| Kaduna        | 21,911             | 29.8                                      | 14.4                                                             | 5                | 46                | 51            | 1,158,048                 | 1,499,000                 | 513,105                                   | 44.3                                          |
| Kano          | 8,507              | 0.1                                       | 0.1                                                              | 16               | 129               | 145           | 4,219,209                 | 5,551,000                 | 1,294,941                                 | 30.7                                          |
| Lagos*        | 11,393             | 6.9                                       | 3.3                                                              | 26               | 770               | 796           | 15,387,639                | 20,600,000                | 3,402,451                                 | 22.1                                          |
| Maiduguri     | 2,535              | 7                                         | 2.6                                                              | 5                | 21                | 26            | 822,337                   | 1,071,000                 | 265,740                                   | 32.3                                          |
| Port Harcourt | 11,367             | 33                                        | 10.3                                                             | 5                | 79                | 84            | 3,324,694                 | 4,595,000                 | 828,146                                   | 24.9                                          |
| Uyo           | 5,138              | 1.5                                       | 0.7                                                              | 3                | 45                | 48            | 1,264,636                 | 1,771,000                 | 461,254                                   | 36.5                                          |
| Warri         | 9,850              | 14.8                                      | 4.2                                                              | 9                | 101               | 110           | 942,683                   | 1,304,000                 | 567,385                                   | 60.2                                          |
| <b>Total</b>  | <b>132,474</b>     | <b>14.3</b>                               | <b>5.2</b>                                                       | <b>120</b>       | <b>1900</b>       | <b>2020</b>   | <b>41,959,240</b>         | <b>56,414,000</b>         | <b>11,498,821</b>                         | <b>27.4</b>                                   |

+S2 cells with population size 0 were excluded from the analysis. Estimates of city population for 2022 and 2030 were obtained from the UN Urbanization Prospectus, and WoCBA data obtained from WorldPop project. The population of Lagos is disputed, with the State government estimating its 2022 population as 26 million.

<sup>^</sup> Accessibility measures were not computed if S2 cell was farther than 50km from any target facility (public, private, or either), or if there was no accessible road path from that S2 cell to a target facility.

**Supplementary Figure 1.** S2 cells included in the current analysis for Aba.

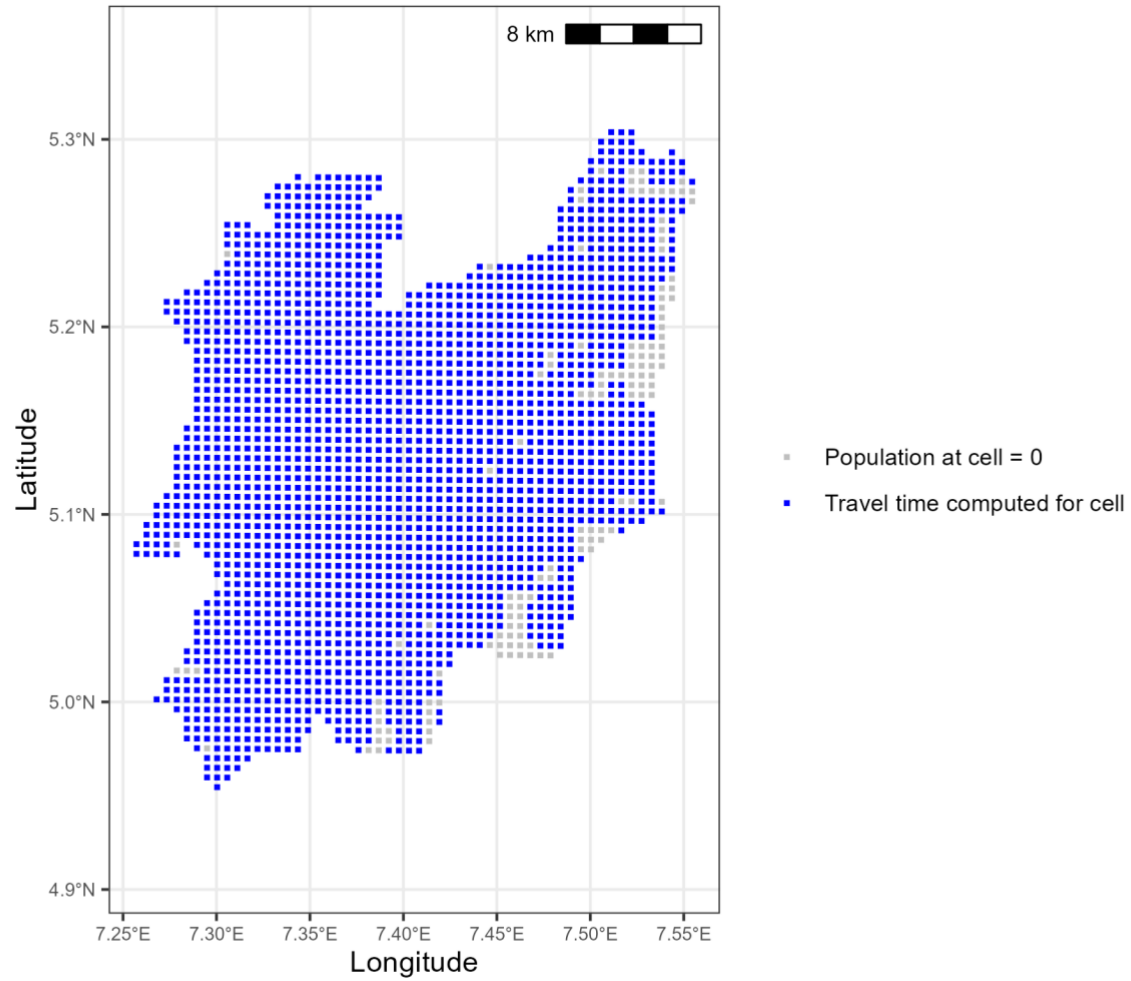

The S2 cells in Aba. Blue cells are include in the current analysis

**Supplementary Figure 2.** S2 cells included in the current analysis for Abuja.

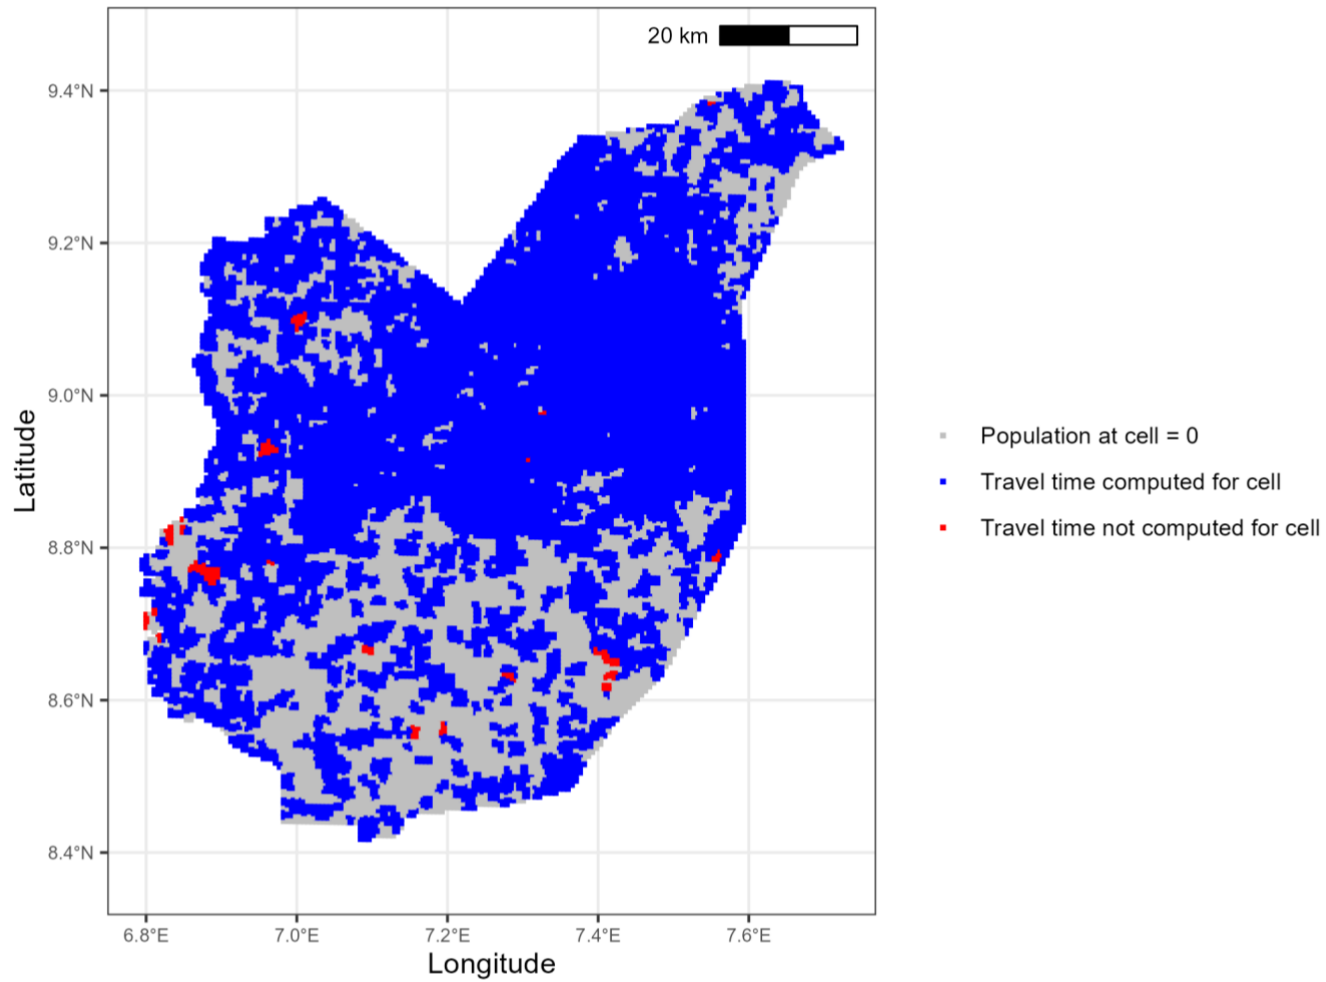

The S2 cells in Abuja. Blue cells are include in the current analysis

**Supplementary Figure 3.** S2 cells included in the current analysis for Benin City.

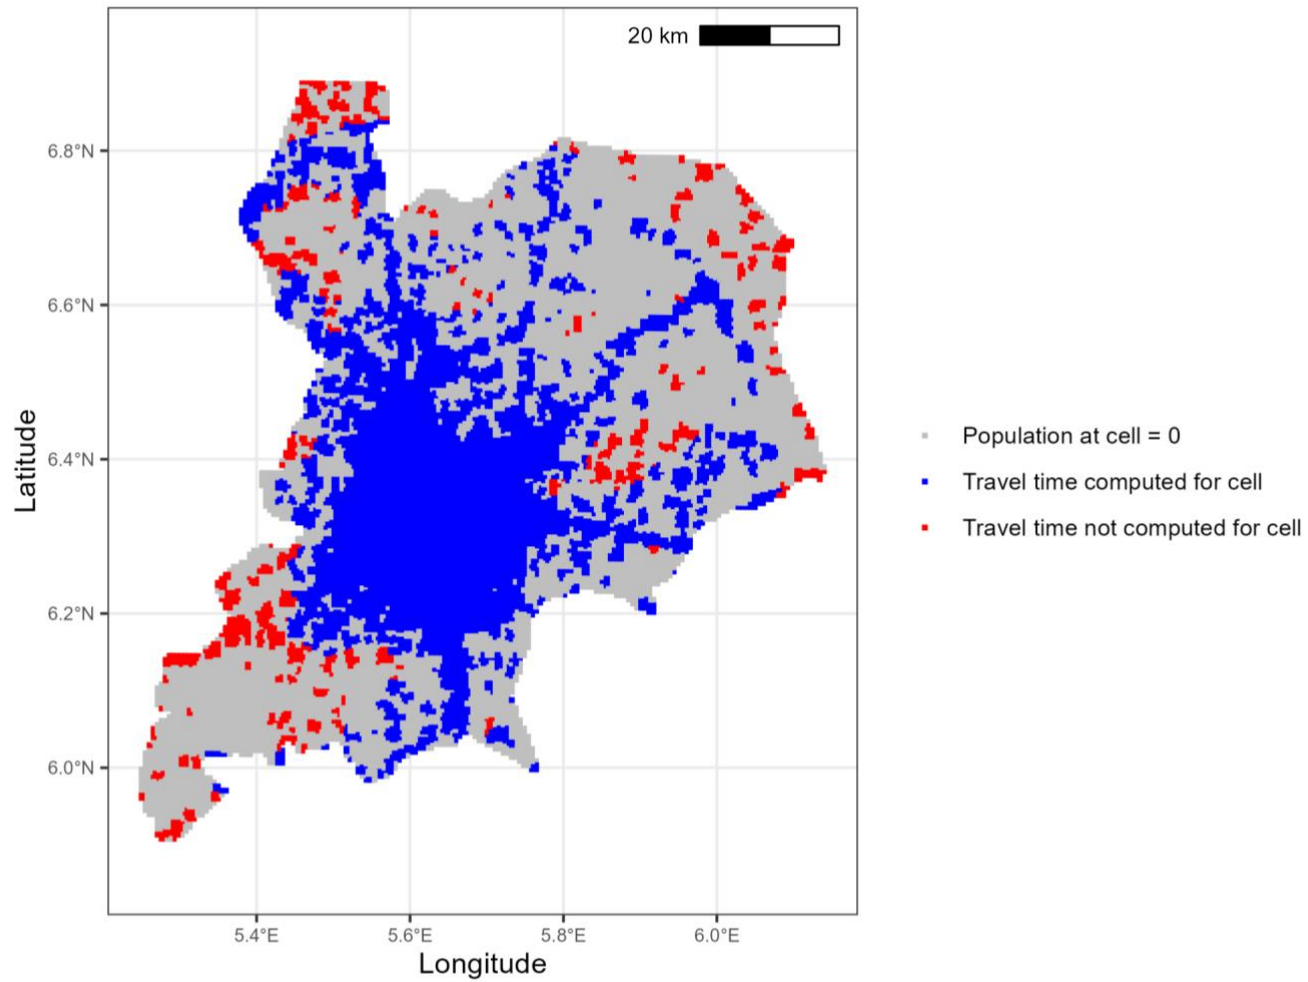

The S2 cells in Benin City. Blue cells are include in the current analysis

**Supplementary Figure 4.** S2 cells included in the current analysis for Ibadan.

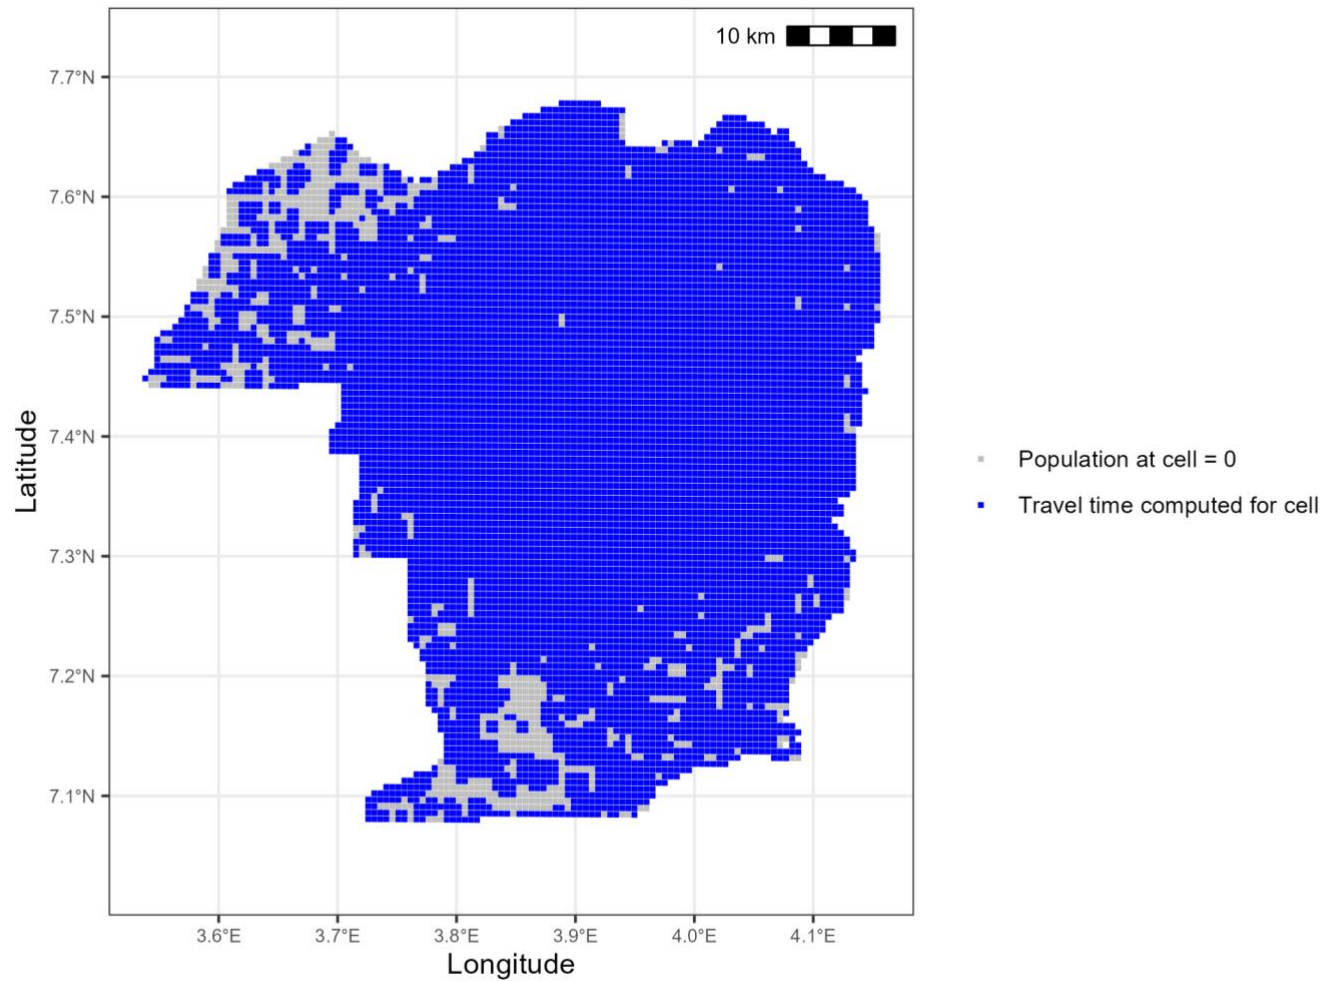

The S2 cells in Ibadan. Blue cells are include in the current analysis

Supplementary Figure 5. S2 cells included in the current analysis for Ilorin.

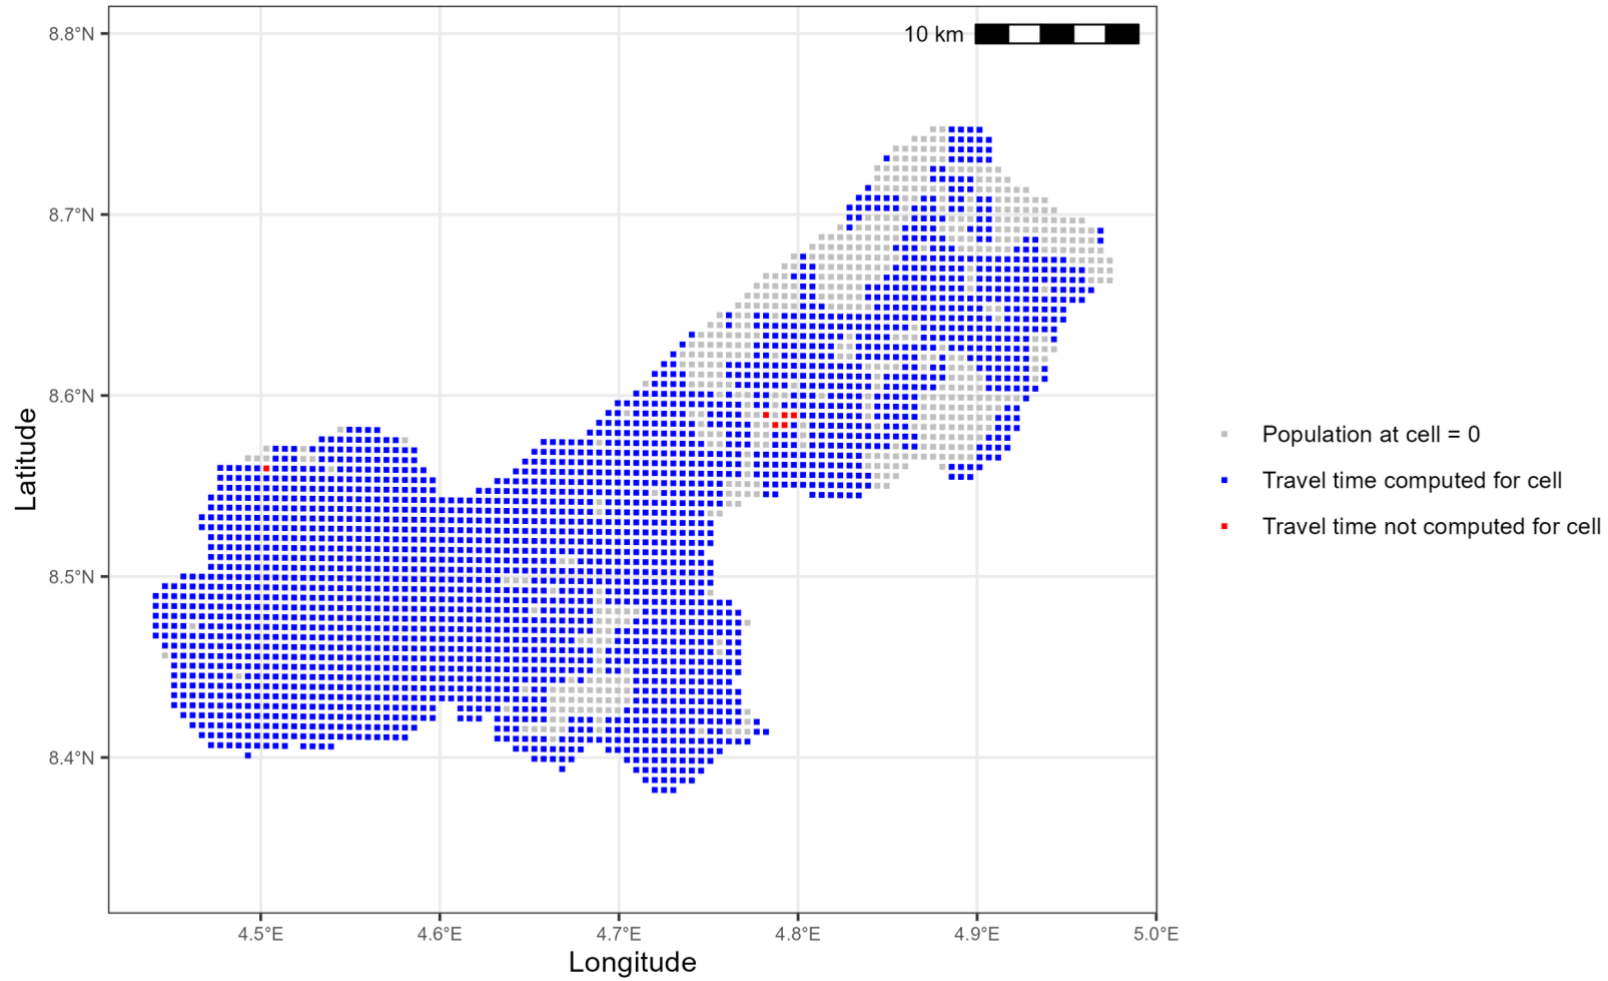

The S2 cells in Ilorin. Blue cells are include in the current analysis

**Supplementary Figure 6.** S2 cells included in the current analysis for Jos.

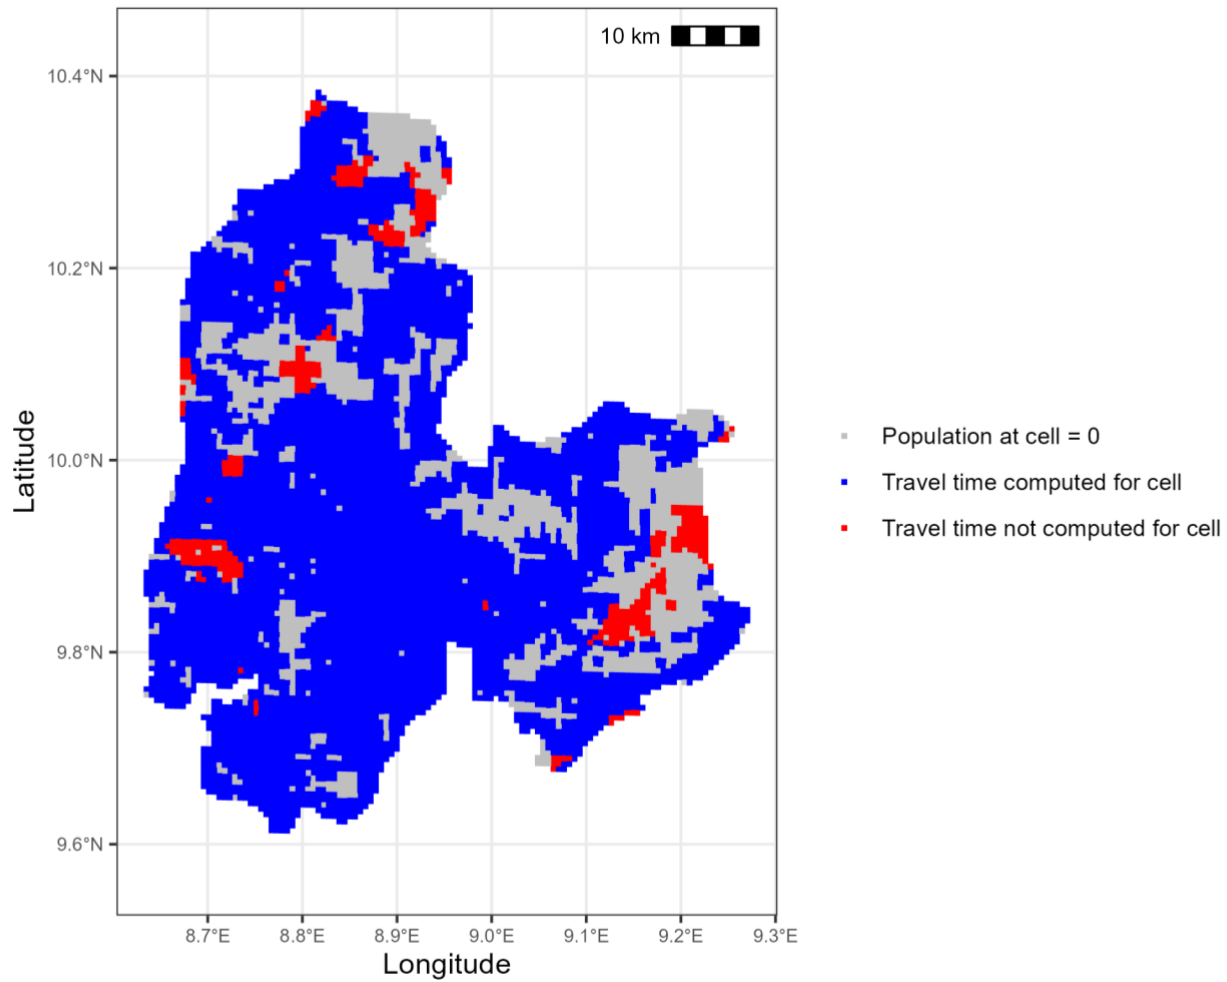

The S2 cells in Jos. Blue cells are include in the current analysis



**Supplementary Figure 7.** S2 cells included in the current analysis for Kaduna.

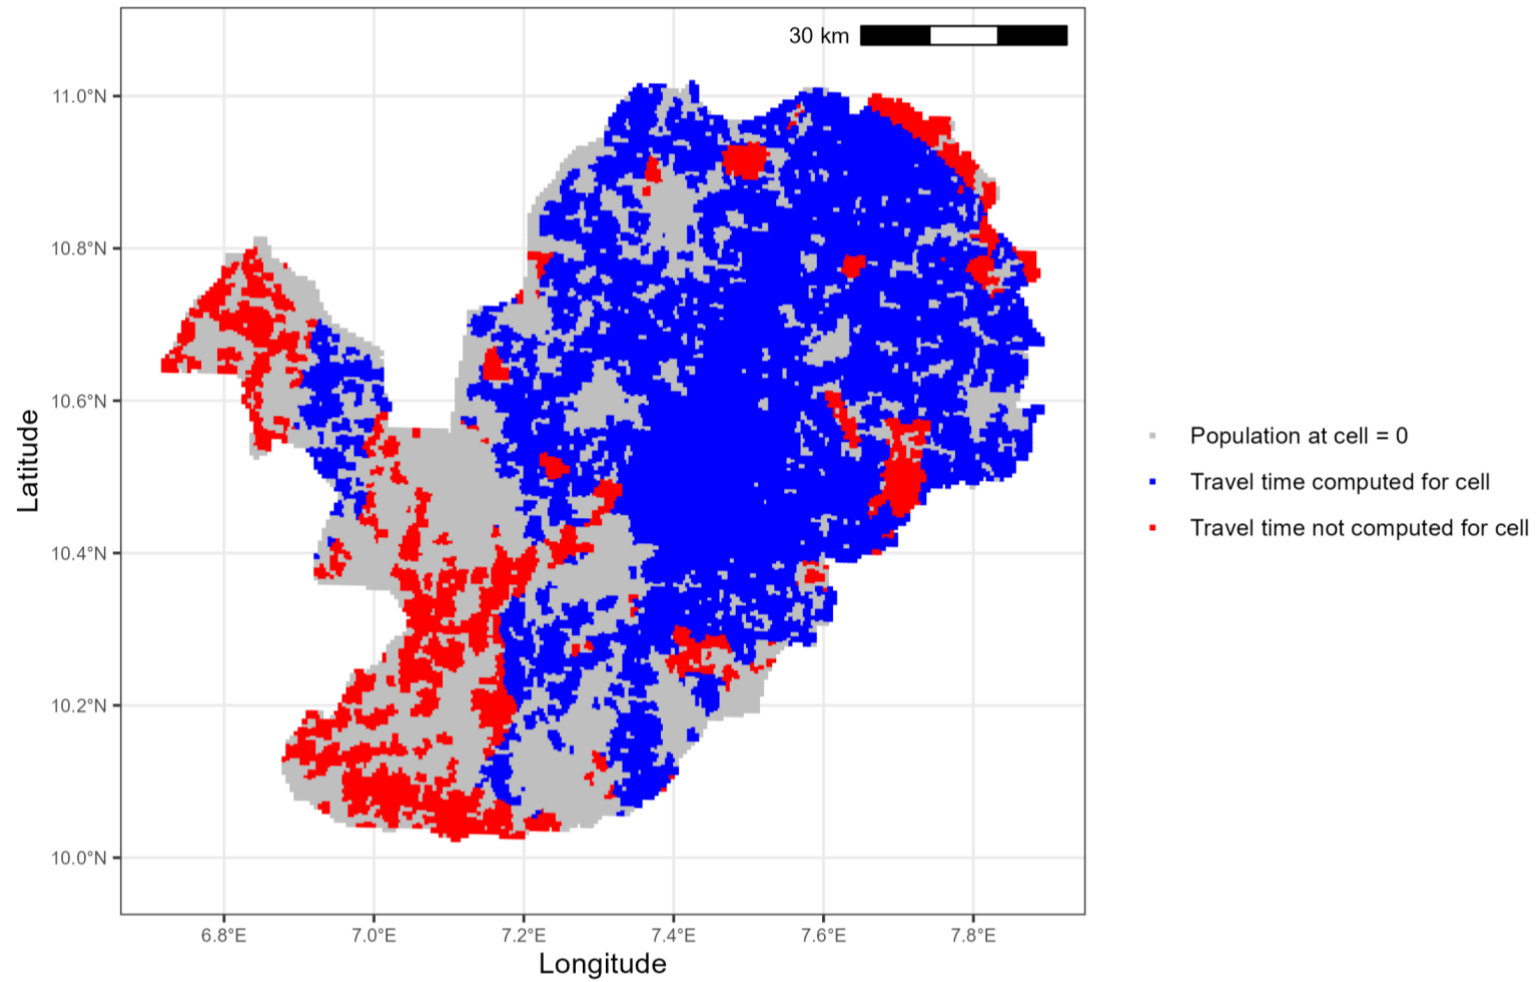

The S2 cells in Kaduna. Blue cells are include in the current analysis

**Supplementary Figure 8.** S2 cells included in the current analysis for Kano.

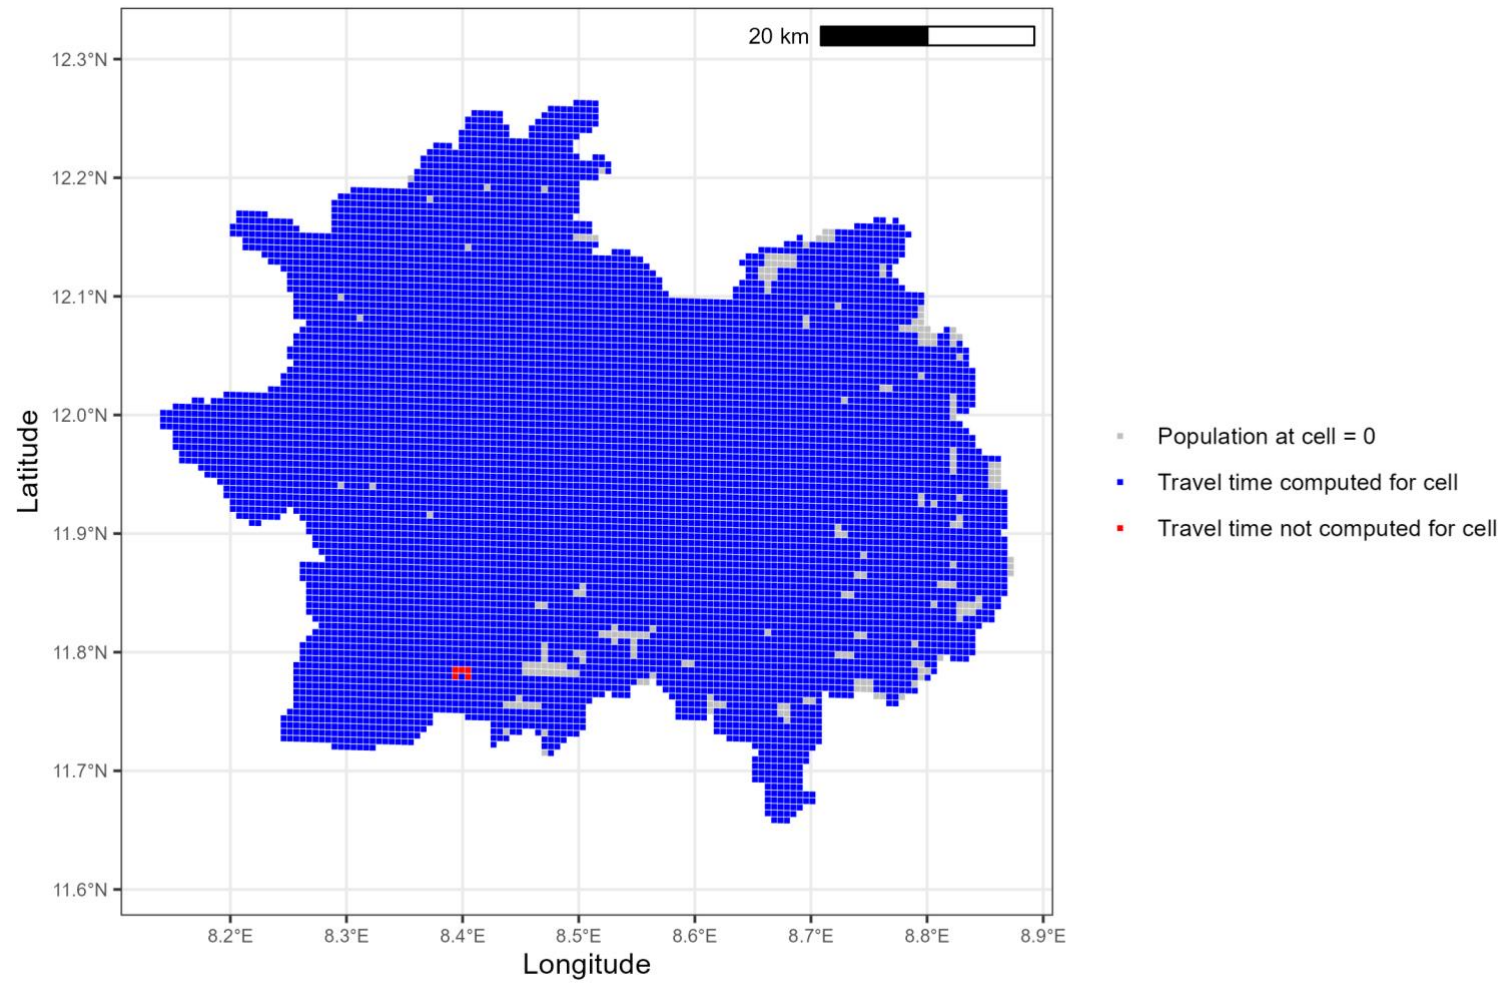

The S2 cells in Kano. Blue cells are include in the current analysis

**Supplementary Figure 9.** S2 cells included in the current analysis for Lagos.

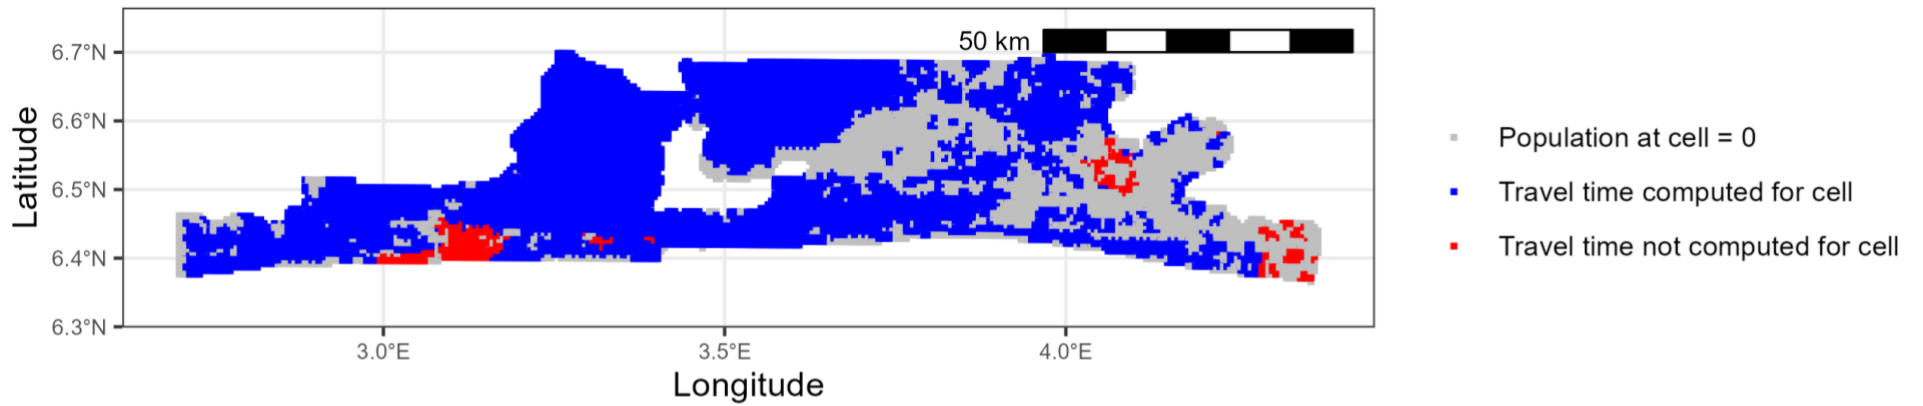

The S2 cells in Lagos. Blue cells are include in the current analysis

**Supplementary Figure 10.** S2 cells included in the current analysis for Maiduguri.

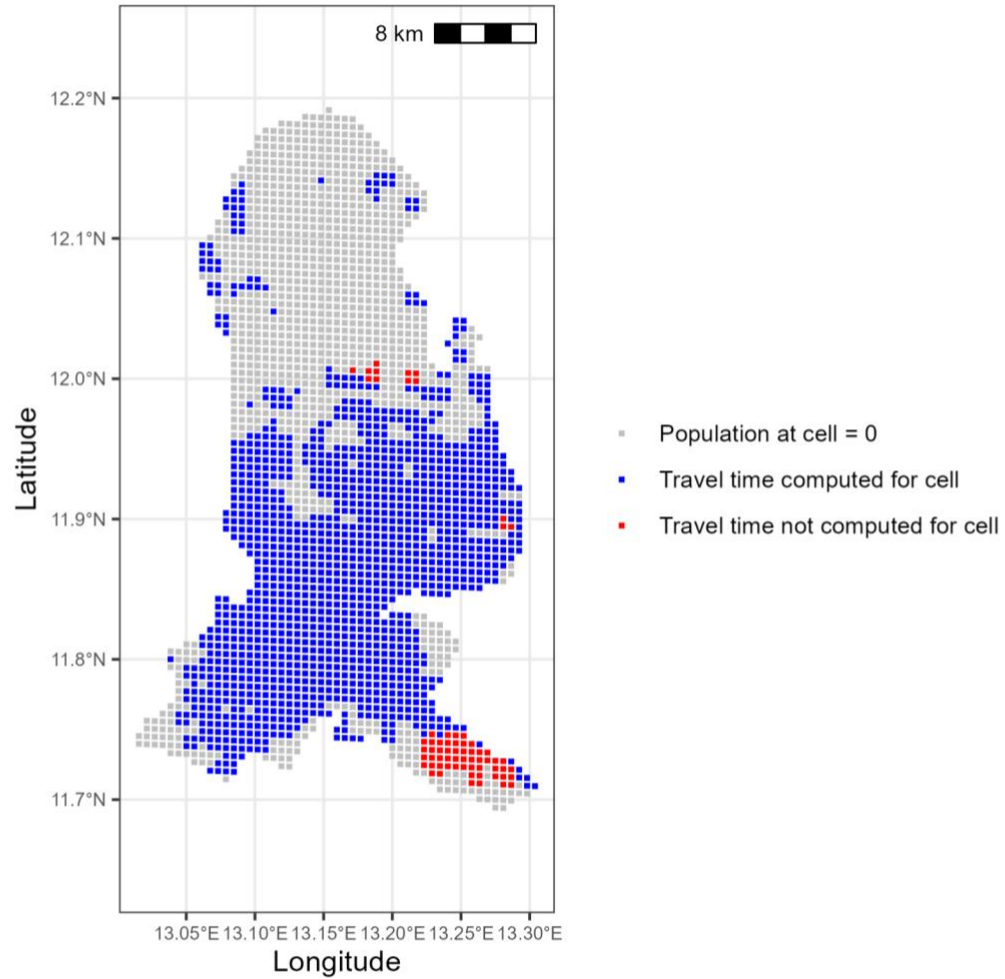

The S2 cells in Maiduguri. Blue cells are include in the current analysis

**Supplementary Figure 11.** S2 cells included in the current analysis for Onitsha.

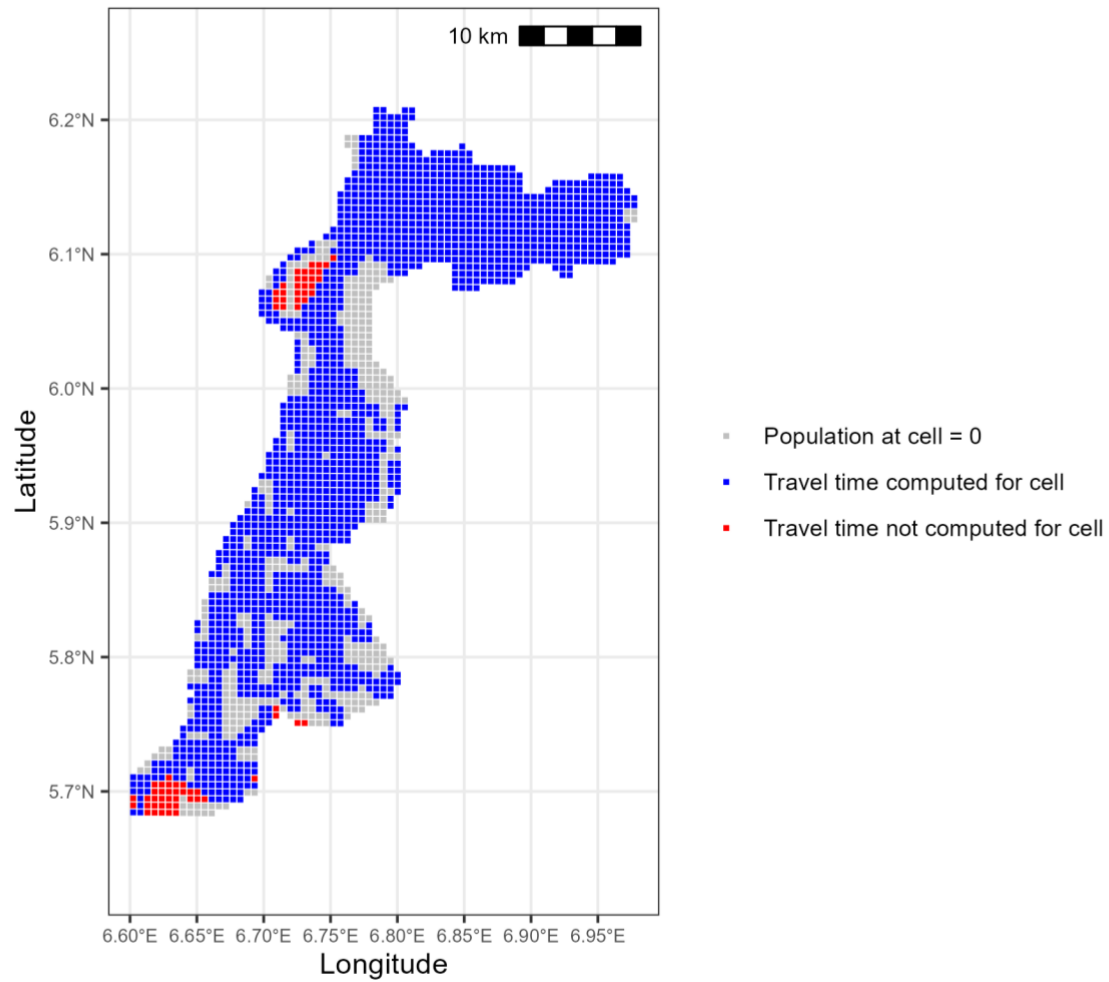

The S2 cells in Onitsha. Blue cells are include in the current analysis

**Supplementary Figure 12.** S2 cells included in the current analysis for Owerri.

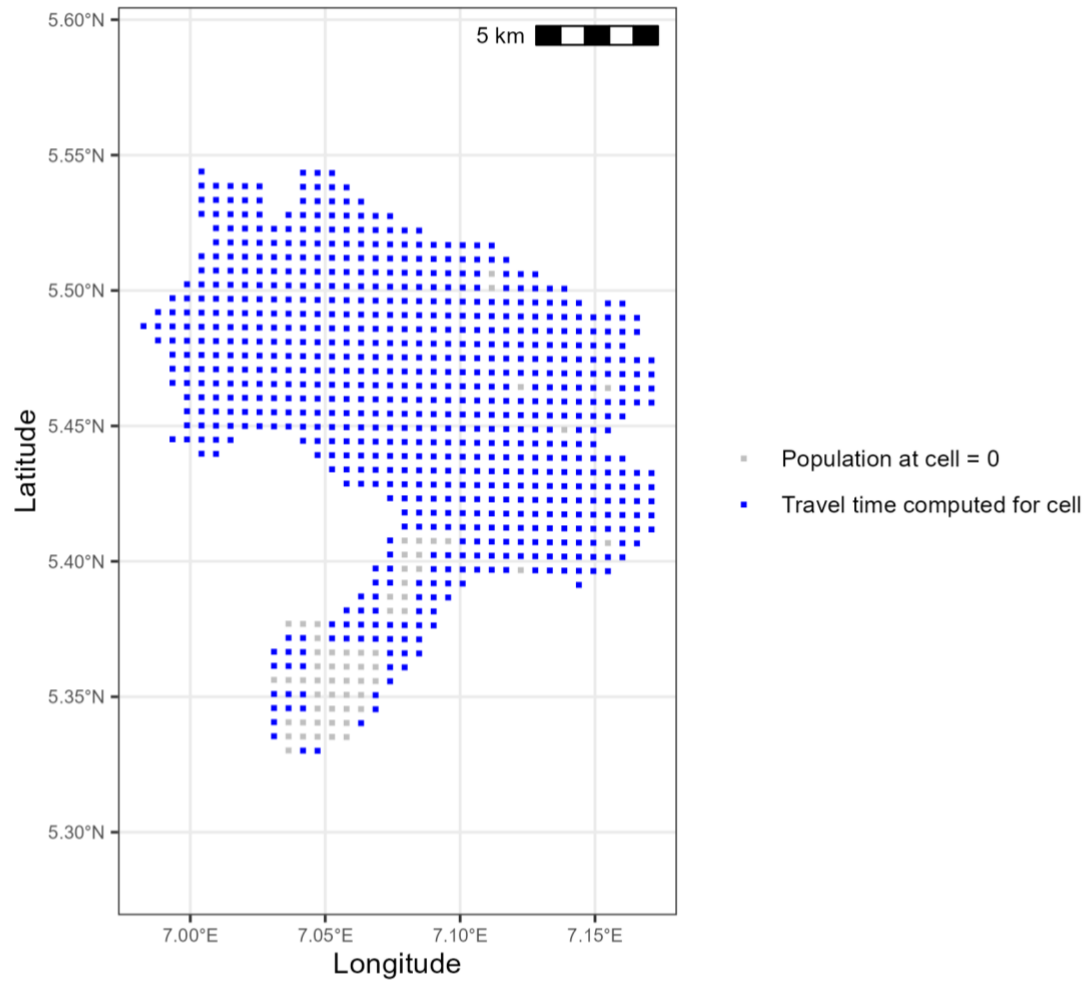

The S2 cells in Owerri. Blue cells are include in the current analysis

**Supplementary Figure 13.** S2 cells included in the current analysis for Port Harcourt.

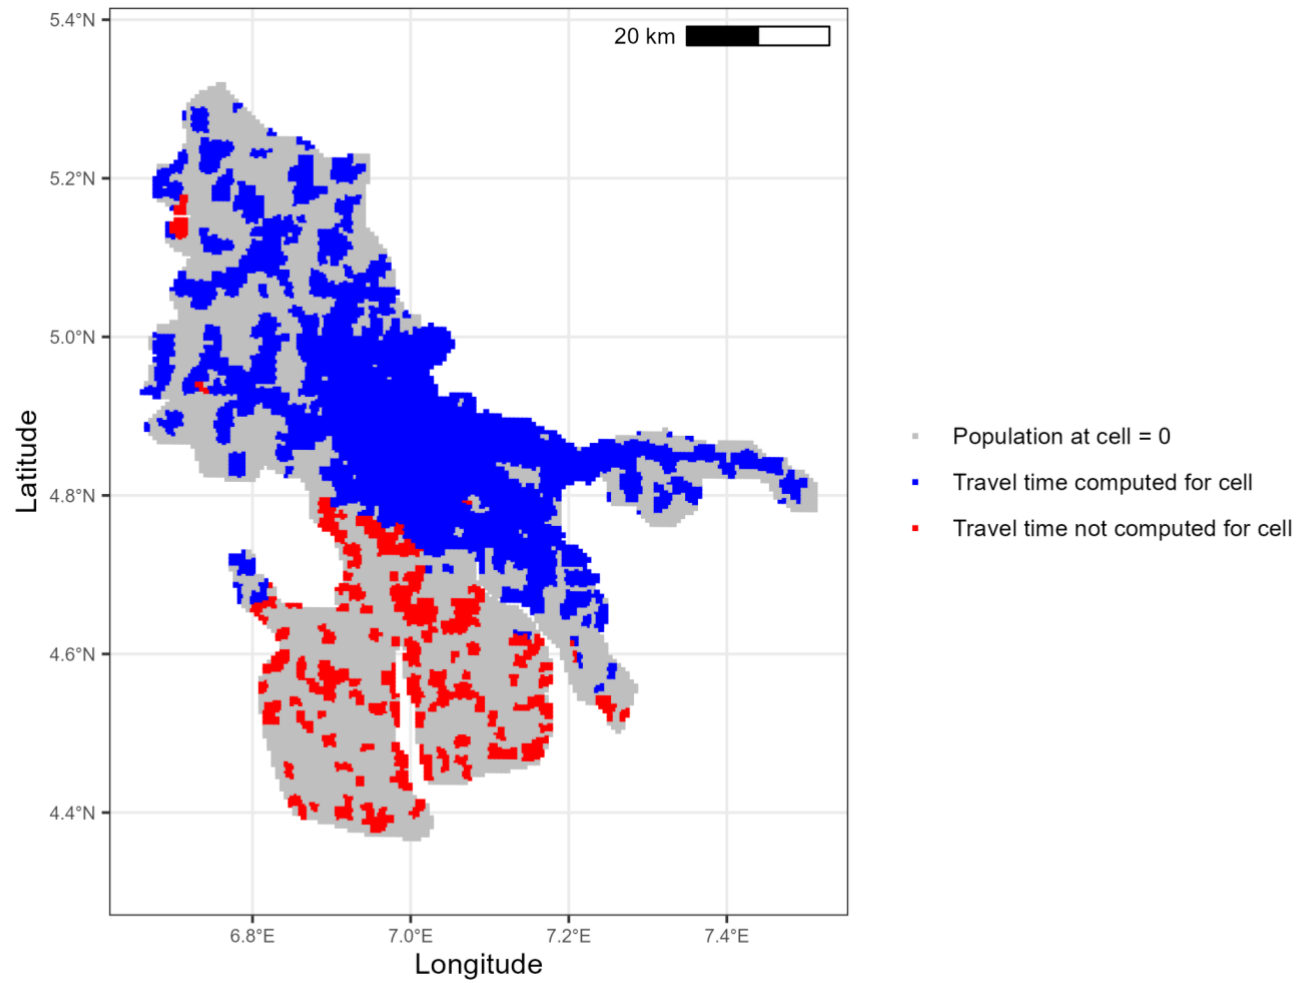

The S2 cells in Port Harcourt. Blue cells are include in the current analysis

**Supplementary Figure 14.** S2 cells included in the current analysis for Uyo.

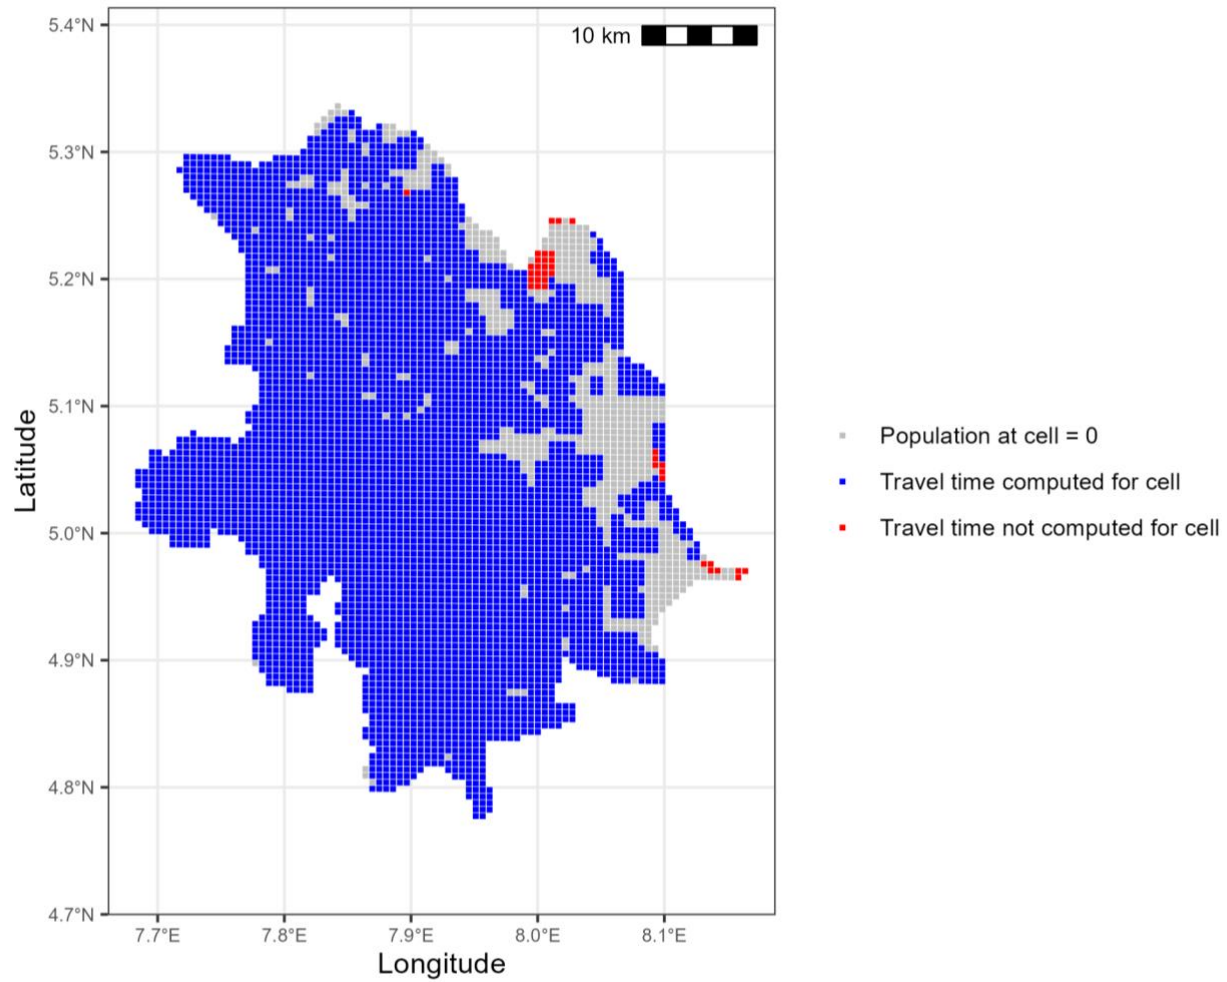

The S2 cells in Uyo. Blue cells are include in the current analysis



**Supplementary Figure 15.** S2 cells included in the current analysis for Warri.

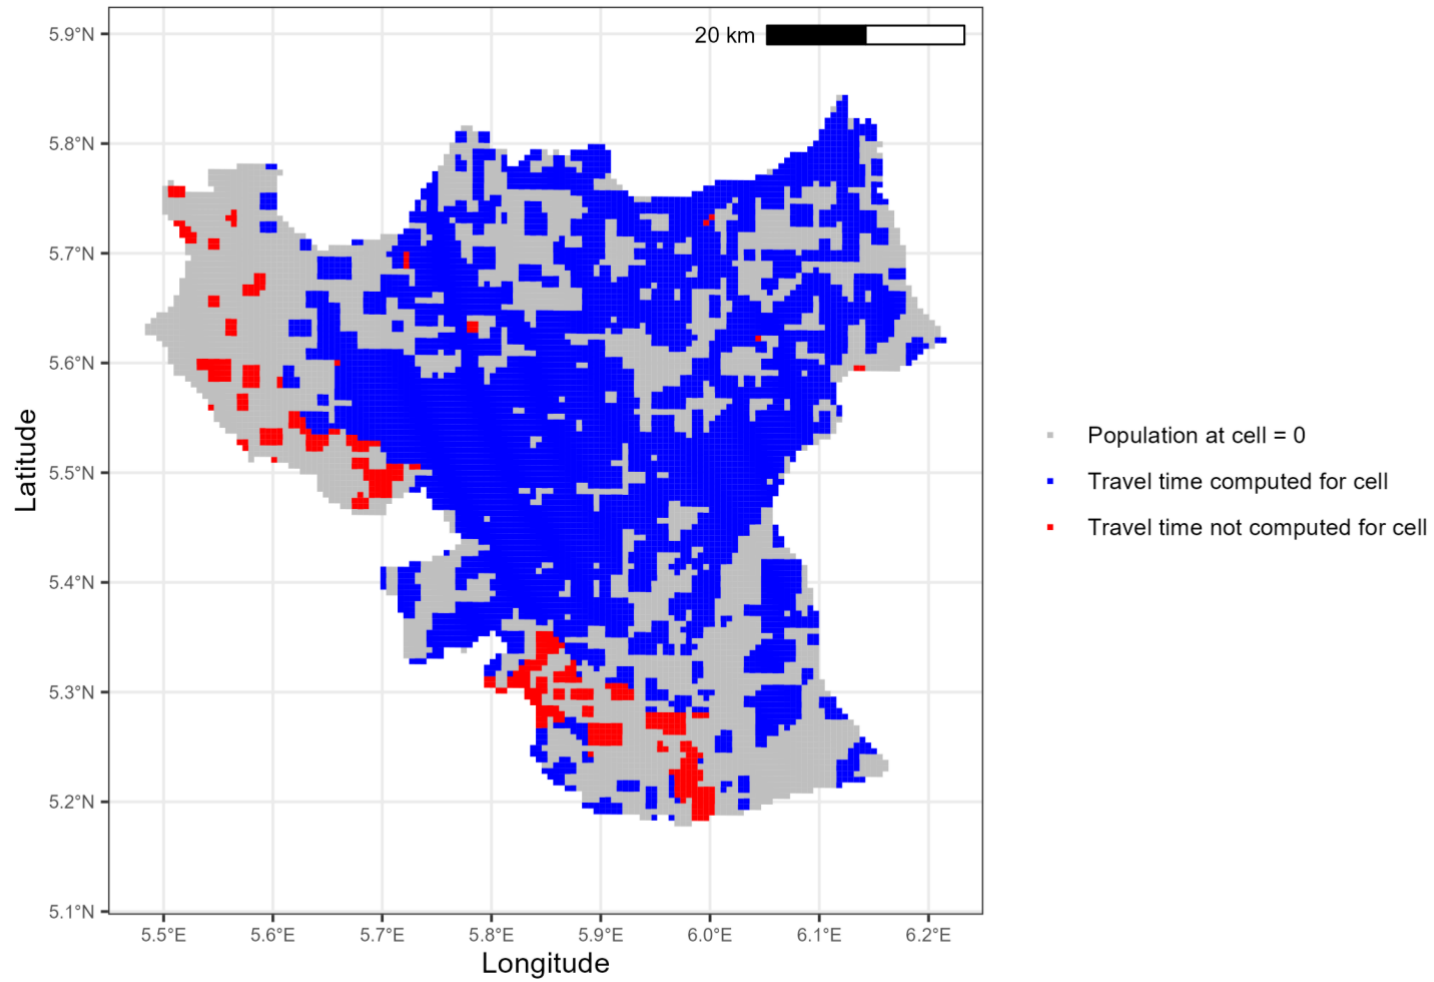

The S2 cells in Warri. Blue cells are include in the current analysis
