# Supplementary material for: Socio-spatial equity analysis of relative wealth index and emergency obstetric care accessibility in urban Nigeria
Source: PubMed Central journal article supplement (PMC10902387; doi:10.1038/s43856-024-00458-2), 2024-02-28
Supplement: 43856_2024_458_MOESM3_ESM.pdf [file 43856_2024_458_MOESM3_ESM.pdf]

1 **Description of Additional Supplementary Files**

2

3 **File Name:** Supplementary Data 1

4 **Description:** Source data for Figures 1-4
